# Supplementary material
Source: publisher site journal article supplement (https://www.dovepress.com/get_supplementary_file.php?f=437400.docx)
Supplement: Supplementary file 1 [file get_supplementary_file.php]

**Supplementary Table 1.** GSEA enrichment analysis results in hematological tumors

| ID | setSize | enrichmentScore | NES | pvalue | p.adjust | qvalue |
| --- | --- | --- | --- | --- | --- | --- |
| REACTOME_DOWNSTREAM_SIGNAL |  |  |  |  |  |  |
| ING_EVENTS_OF_B_CELL_RECEPT |  |  |  |  |  |  |
| OR_BCR | 81 | 0.526806998 | 2.303030476 | 4.28006E-08 | 8.46576E-07 | 4.70754E-07 |
| BIOCARTA_MAPK_PATHWAY | 81 | 0.504290705 | 2.2045965 | 3.35165E-07 | 5.36265E-06 | 2.98199E-06 |
| REACTOME_REGULATION_OF_RAS_ |  |  |  |  |  |  |
| BY_GAPS | 68 | 0.475950303 | 2.026826418 | 2.01397E-05 | 0.000187208 | 0.0001041 |
| REACTOME_PTEN_REGULATION | 139 | 0.447640885 | 2.025409993 | 2.28753E-08 | 4.82879E-07 | 2.68514E-07 |
| REACTOME_SIGNALING_BY_HEDGE |  |  |  |  |  |  |
| HOG | 150 | 0.404013371 | 1.883343379 | 1.28992E-06 | 1.72355E-05 | 9.58409E-06 |
| REACTOME_TRANSCRIPTIONAL_RE |  |  |  |  |  |  |
| GULATION_BY_RUNX1 | 237 | 0.3792509 | 1.859235666 | 3.31307E-09 | 8.76046E-08 | 4.87141E-08 |
| REACTOME_SIGNALING_BY_WNT | 330 | 0.345474661 | 1.768049654 | 1.32716E-08 | 2.95505E-07 | 1.64321E-07 |
| PID_MYC_ACTIVE_PATHWAY | 79 | 0.402520465 | 1.754330867 | 0.000708059 | 0.003585979 | 0.001994047 |
| REACTOME_REGULATION_OF_TP53 |  |  |  |  |  |  |
| _ACTIVITY | 160 | 0.345993332 | 1.630102769 | 8.29068E-05 | 0.000619827 | 0.000344666 |


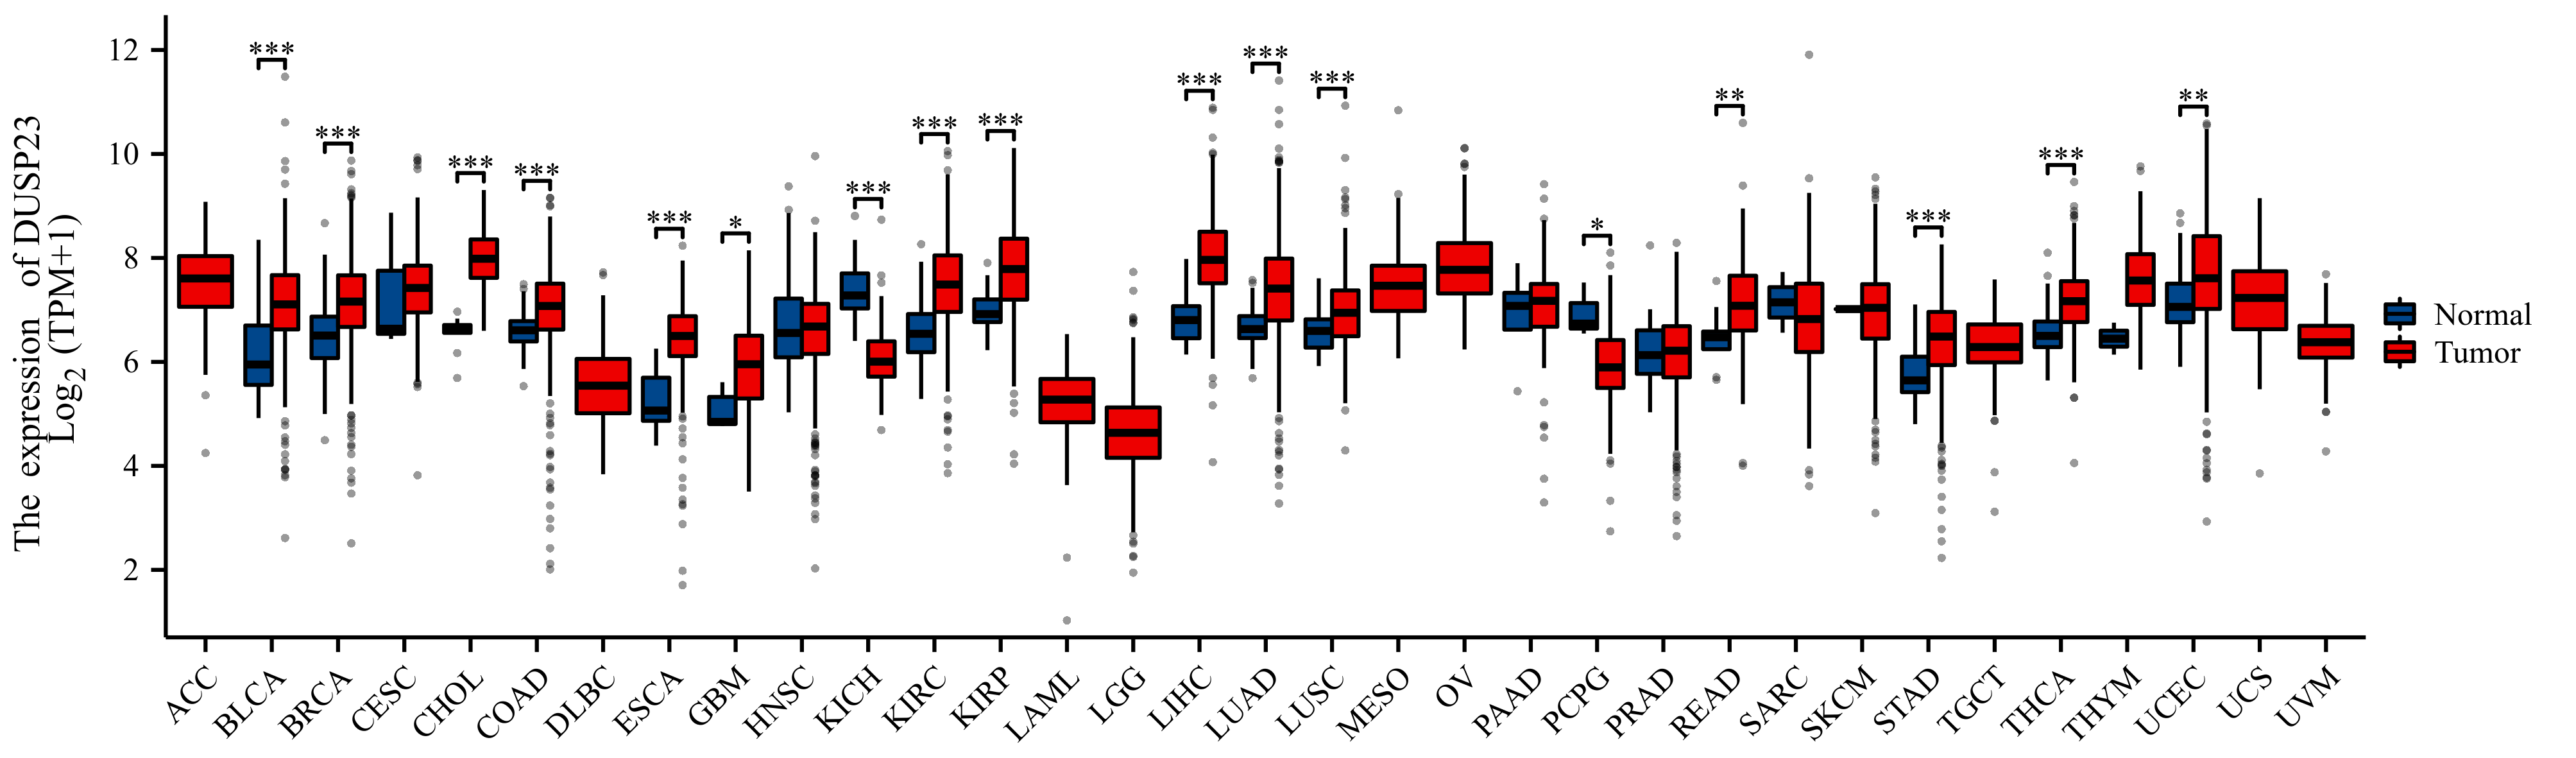


**Supplementary figure 1**

DUSP23 expression in tumor and normal tissues in pan-cancer data of The Cancer Genome Atlas (TCGA) and GTEx. The blue box presented the results of normal tissues and the red box presented tumor tissues (*P < 0.05; **P < 0.01; ***P < 0.001).


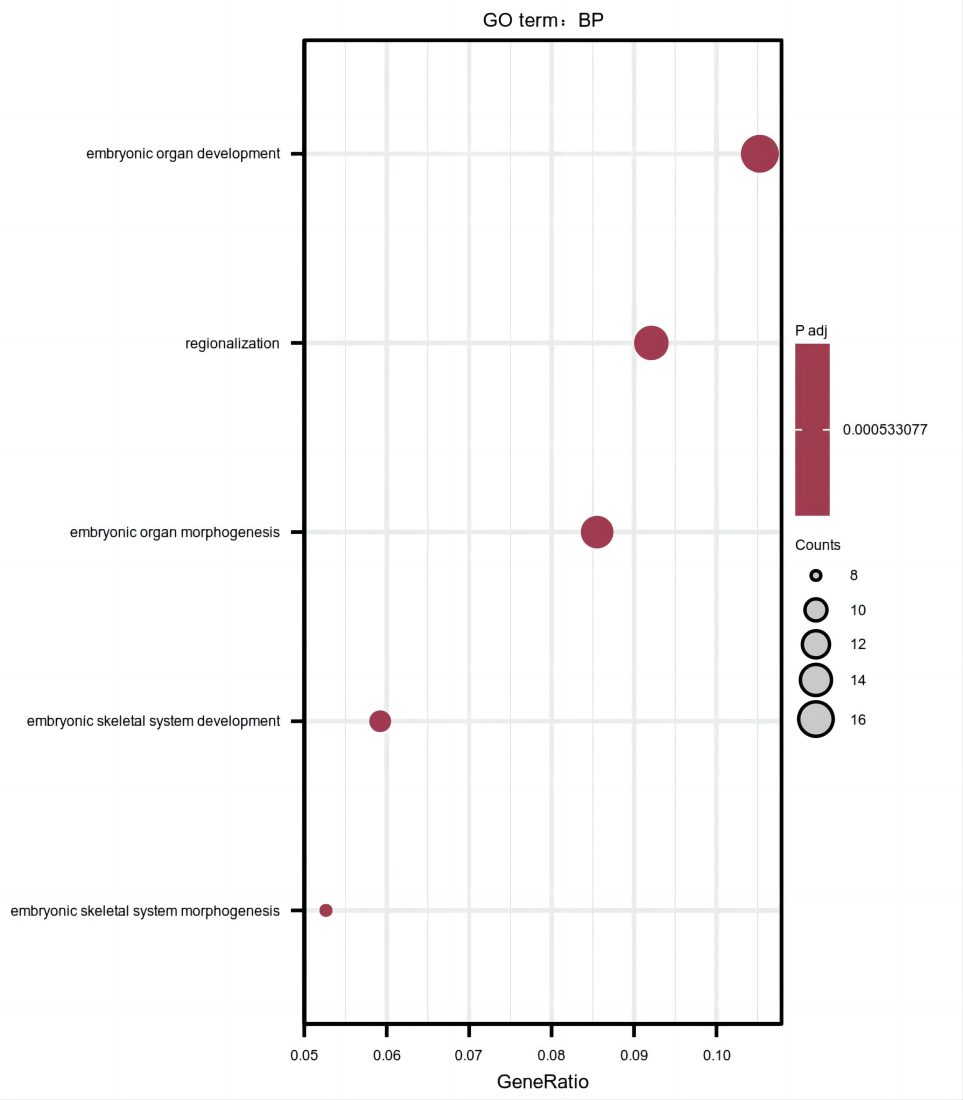

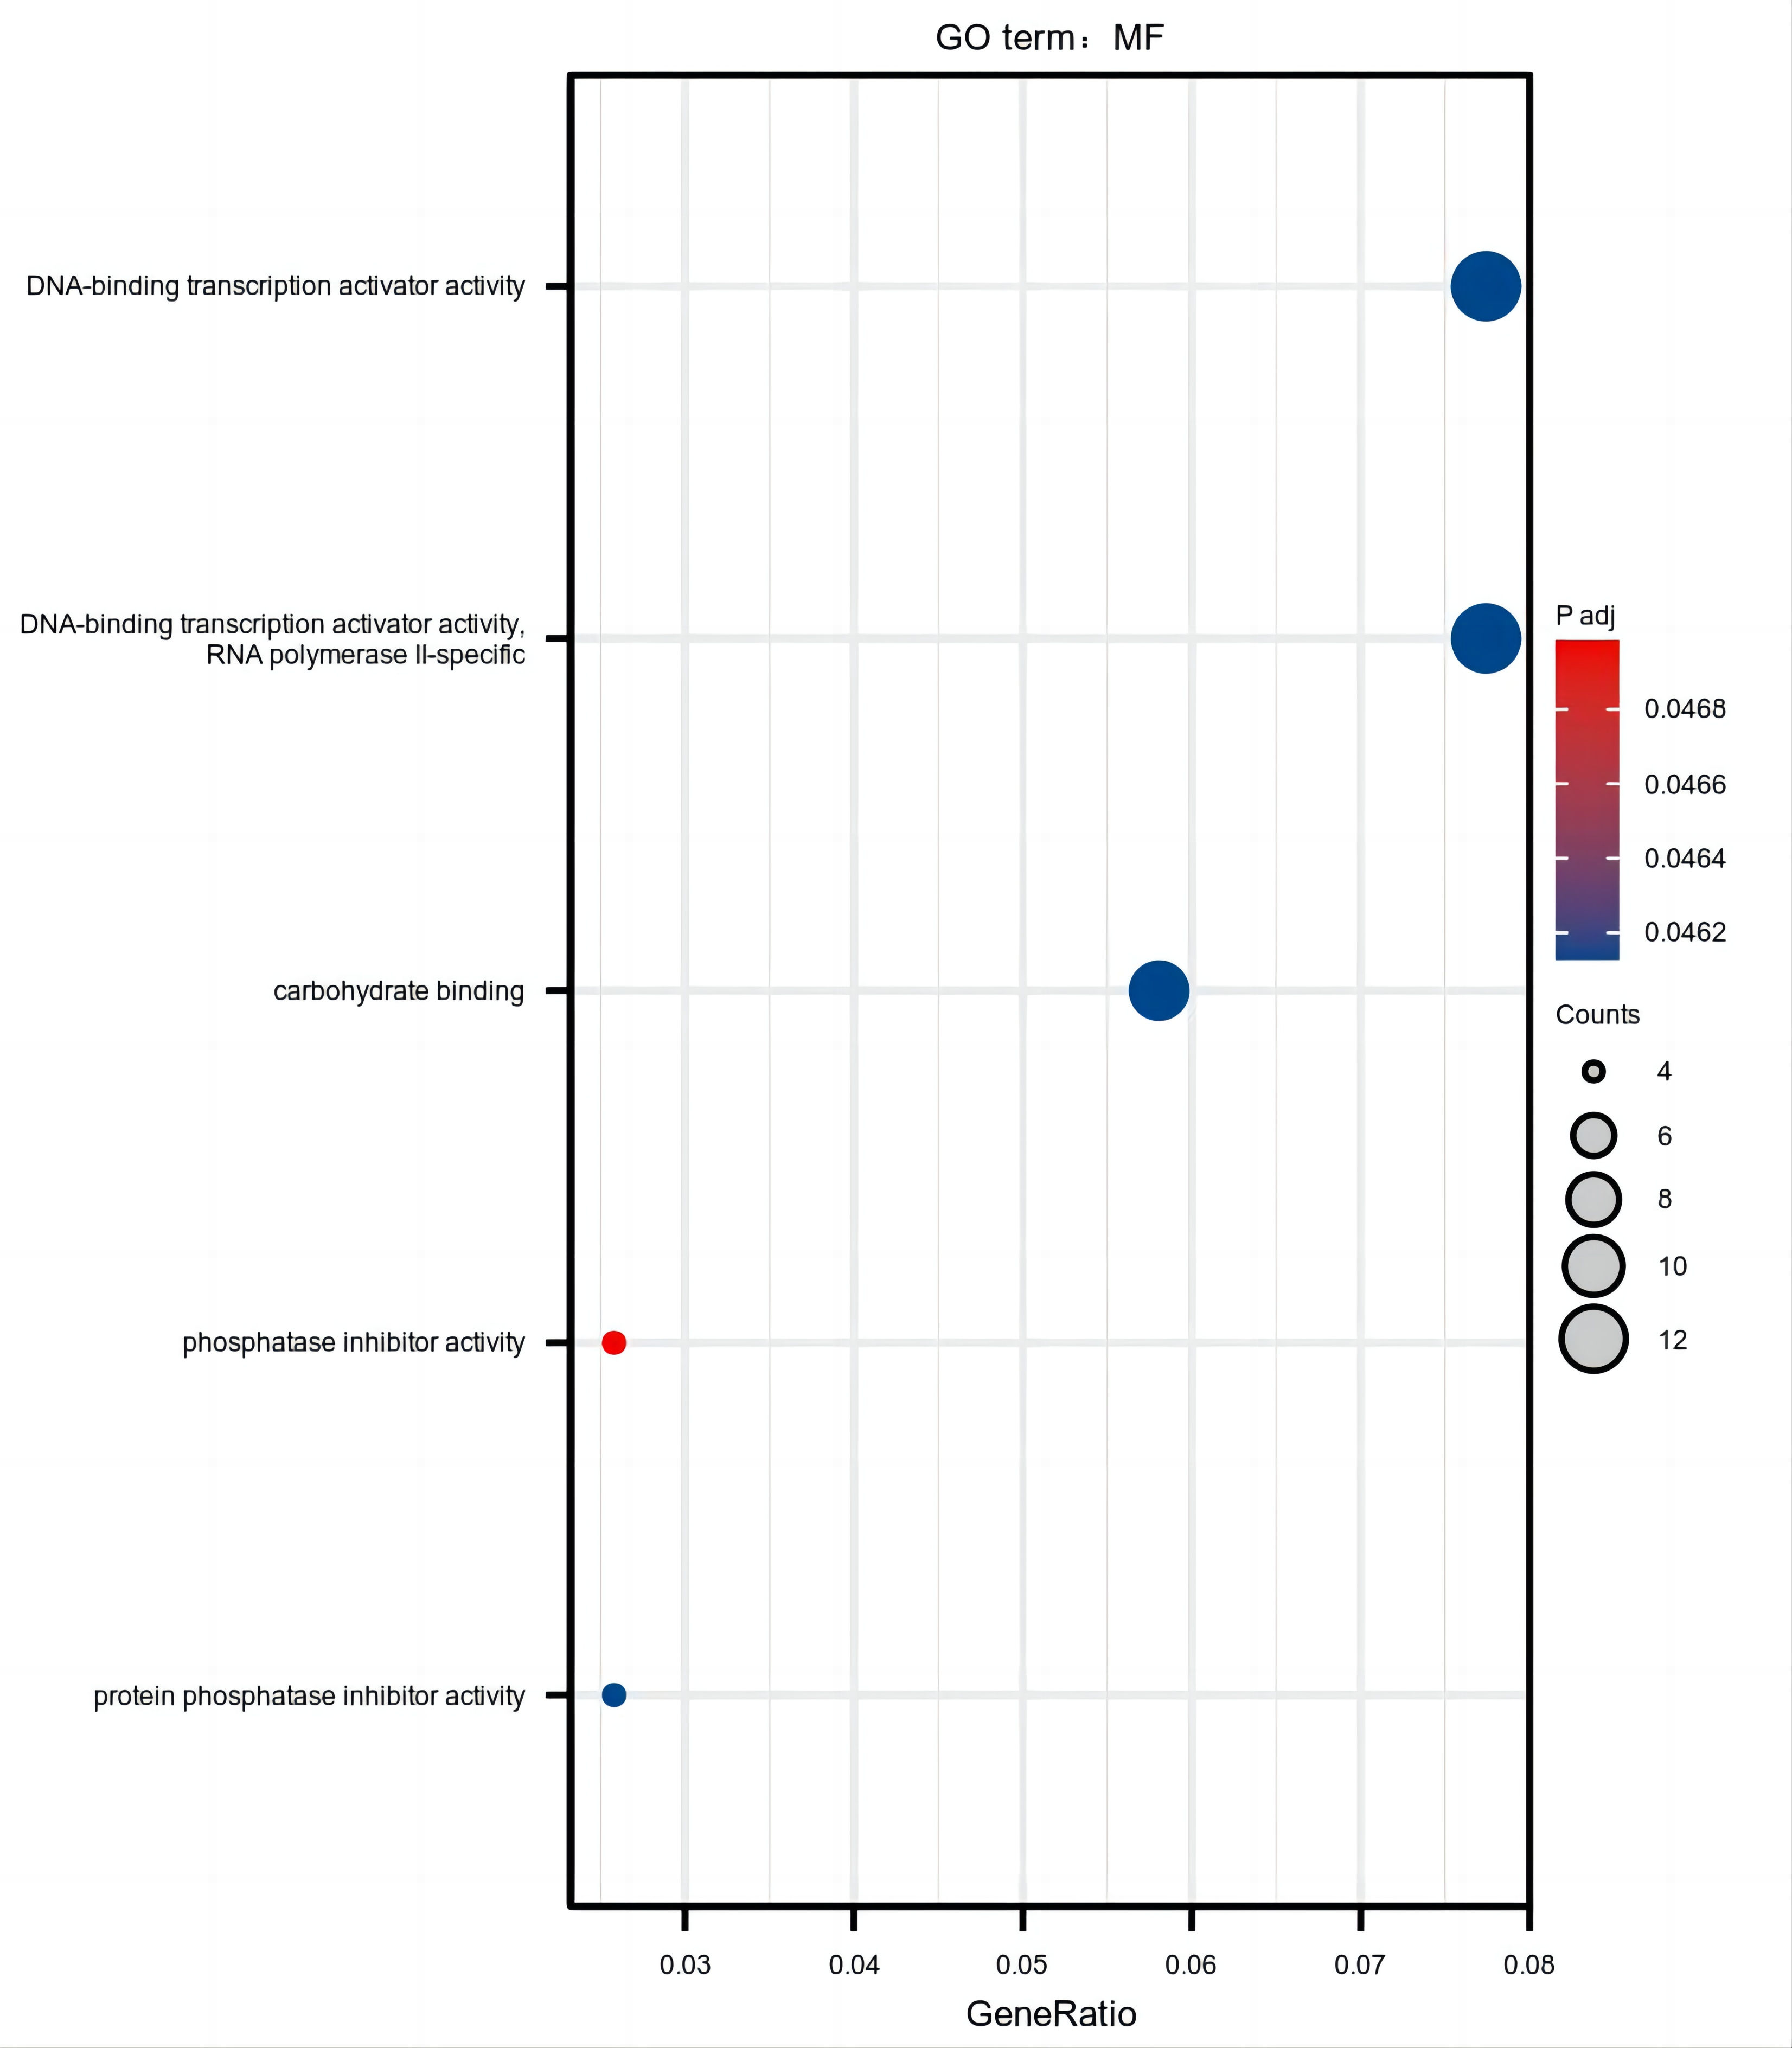

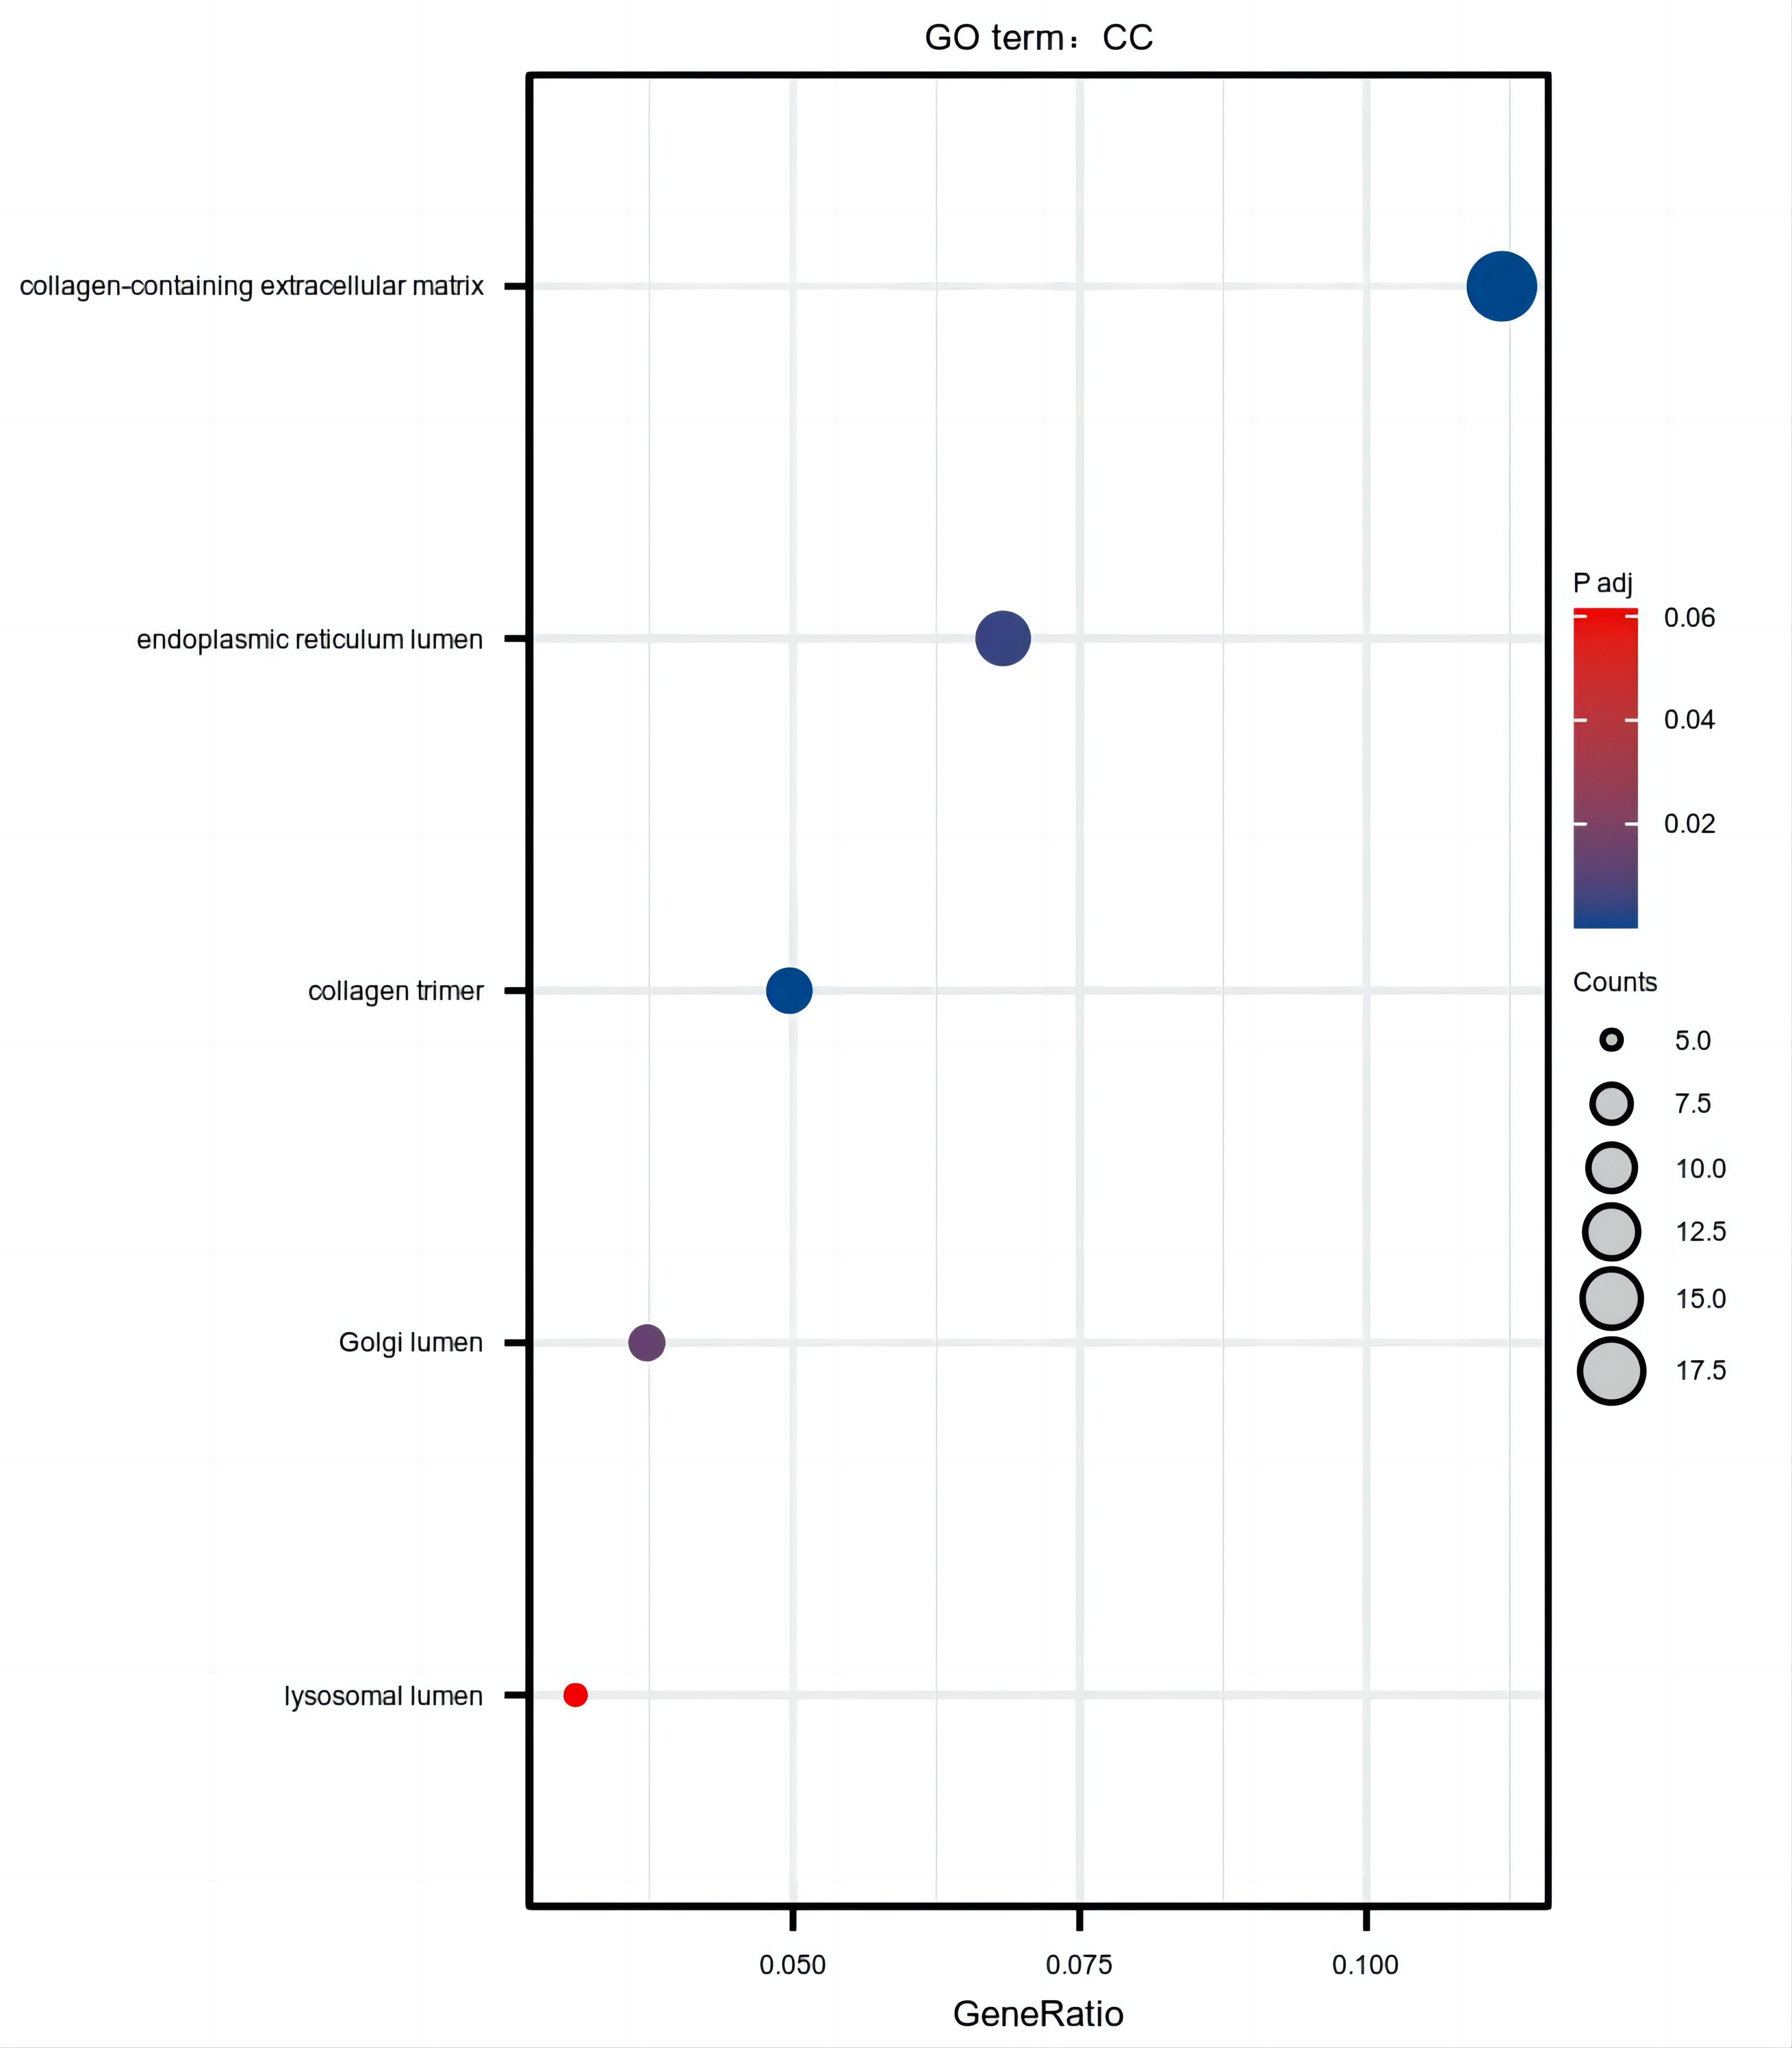

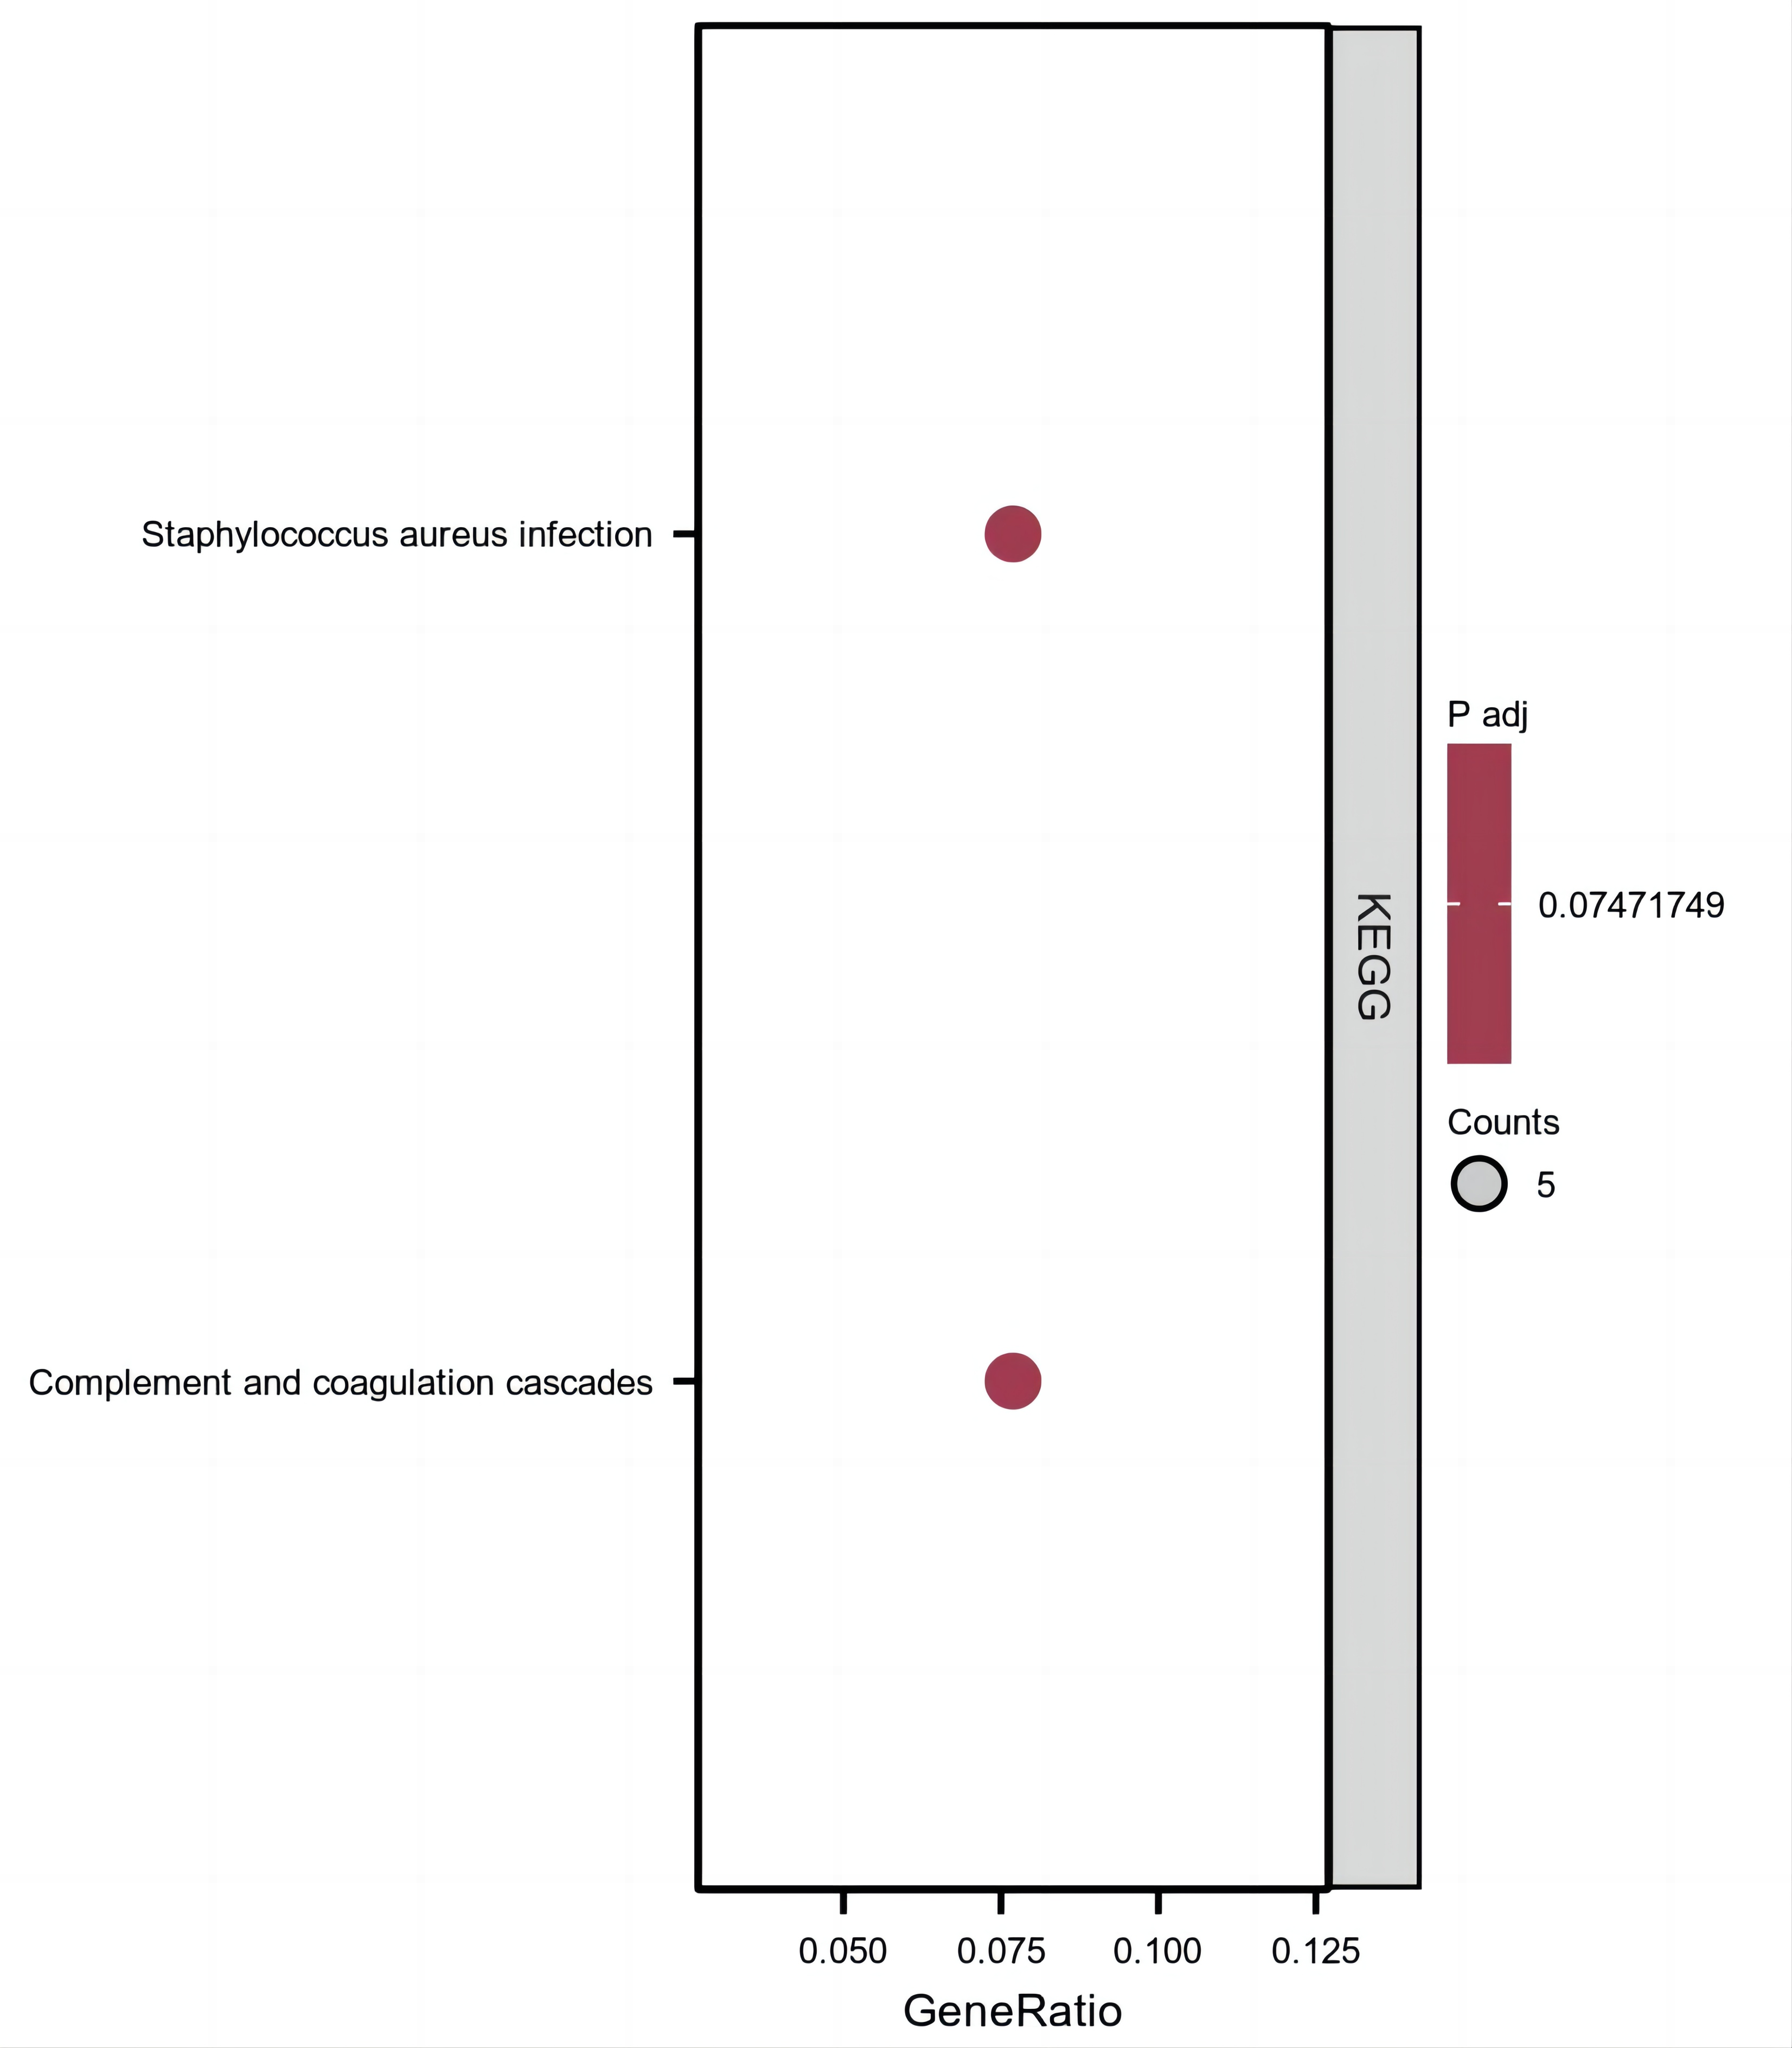


A B C D

**Supplementary figure 2**

(A)biological process (BP);(B) molecular functions (MF);(C) cellular components (CC);(D) KEGG pathways of DUSP23-related DEGs. Each red plot in the graph represents a specific gene included in the gene-set. Each blue plot represents the enriched gene-sets. The size of the blue plot represents the number of gene read counts in the gene-sets.
